# Supplementary material
Source: HighWire-hosted journal article supplement (http://jmg.bmjjournals.com/highwire/filestream/160639/field_highwire_adjunct_files/4/Supplementary_Tables.pdf)
Supplement: Supplementary_Tables.pdf [file Supplementary_Tables.pdf]

**Supplementary Table 1. Polymorphic SNPs genotyped at Sequenom.**

| Assay_Name | Gene          |
|------------|---------------|
| rs1227070  | <i>CDH23</i>  |
| rs1867998  | <i>CDH23</i>  |
| rs4999379  | <i>CDH23</i>  |
| rs723274   | <i>CDH23</i>  |
| rs1055518  | <i>CDH23</i>  |
| rs4746085  | <i>CDH23</i>  |
| rs7910896  | <i>CDH23</i>  |
| rs10942605 | <i>GPR98</i>  |
| rs1700510  | <i>GPR98</i>  |
| rs2010355  | <i>GPR98</i>  |
| rs2438351  | <i>GPR98</i>  |
| rs3098356  | <i>GPR98</i>  |
| rs4944143  | <i>MYO7A</i>  |
| rs6592711  | <i>MYO7A</i>  |
| rs12793189 | <i>MYO7A</i>  |
| rs2156568  | <i>MYO7A</i>  |
| rs10825347 | <i>PCDH15</i> |
| rs1930164  | <i>PCDH15</i> |
| rs2583026  | <i>PCDH15</i> |
| rs4570494  | <i>PCDH15</i> |
| rs6481065  | <i>PCDH15</i> |
| rs7095441  | <i>PCDH15</i> |
| rs10763126 | <i>PCDH15</i> |
| rs10825195 | <i>PCDH15</i> |
| rs17728345 | <i>PCDH15</i> |
| rs1937392  | <i>PCDH15</i> |
| rs7095317  | <i>PCDH15</i> |
| rs9416371  | <i>PCDH15</i> |
| rs9828914  | <i>SLC4A7</i> |
| rs1494420  | <i>SLC4A7</i> |
| rs2072227  | <i>USH1C</i>  |
| rs2240488  | <i>USH1C</i>  |
| rs2883581  | <i>USH1C</i>  |
| rs12033676 | <i>USH2A</i>  |
| rs2168924  | <i>USH2A</i>  |
| rs2168924  | <i>USH2A</i>  |
| rs12635944 | <i>USH3A</i>  |
| rs6801898  | <i>USH3A</i>  |
| rs718841   | <i>WHRN</i>   |
| rs942520   | <i>WHRN</i>   |

|            |             |
|------------|-------------|
| rs10759697 | <i>WHRN</i> |
| rs10982231 | <i>WHRN</i> |
| rs4979379  | <i>WHRN</i> |
| rs7034891  | <i>WHRN</i> |
| rs7036125  | <i>WHRN</i> |

**Supplementary Table 2. Novel UV2-UV4 and pathogenic variants.**

| Gene name     | DNA change                | Protein change           | MAF (%) in controls <sup>a</sup> | Ortholog Conservation <sup>d</sup> | 1000 Genomes <sup>f</sup> | Pathogenicity |
|---------------|---------------------------|--------------------------|----------------------------------|------------------------------------|---------------------------|---------------|
| <i>CDH23</i>  | c.2177-2A>G               | p.?                      | 0 [0/96 CEPH]                    | NA                                 | No                        | Pathogenic    |
| <i>CDH23</i>  | c.6254_6254-3delCAGGinsT  | p.?                      | 0 [0/96 CEPH]                    | NA                                 | No                        | Pathogenic    |
| <i>CDH23</i>  | c.6712+1G>A               | p.?                      | 0                                | NA                                 | No                        | Pathogenic    |
| <i>CDH23</i>  | c.7305dup                 | p.Leu2436ThrfsX3         | 0 [0/96 CEPH]                    | NA                                 | No                        | Pathogenic    |
| <i>CDH23</i>  | c.7362G>A*                | p.Thr2454Thr             | 0                                | NA                                 | No                        | UV3           |
| <i>CDH23</i>  | c.9122T>C                 | p.Leu3041Pro             | 0                                | 16 / 17 (94.12%)                   | No                        | UV4           |
| <i>MYO7A</i>  | c.1138G>A                 | p.Glu380Lys              | 0 [0/93 CEPH]                    | 21 / 23 (91.30%)                   | No                        | UV2           |
| <i>MYO7A</i>  | c.1258A>T                 | p.Lys420X                | 0 [0/96 CEPHs]                   | NA                                 | No                        | Pathogenic    |
| <i>MYO7A</i>  | c.1798-3C>G               | p.?                      | 0 [0/96 CEPH]                    | NA                                 | No                        | UV2           |
| <i>MYO7A</i>  | c.223G>C                  | p.Asp75His               | 0                                | 24 / 24 (100%)                     | No                        | UV4           |
| <i>MYO7A</i>  | c.3108+1G>A               | p.?                      | 0                                | NA                                 | No                        | Pathogenic    |
| <i>MYO7A</i>  | c.338_348dup              | p.Glu117SerfsX33         | 0 [0/96 CEPH]                    | NA                                 | No                        | Pathogenic    |
| <i>MYO7A</i>  | c.4131dup                 | p.Gly1378TrpfsX6         | 0 [0/96 CEPH]                    | NA                                 | No                        | Pathogenic    |
| <i>MYO7A</i>  | c.4293G>A                 | p.Trp1431X               | 0                                | NA                                 | No                        | Pathogenic    |
| <i>MYO7A</i>  | c.4838delA                | p.Asp1613ValfsX32        | 0 [0/96 CEPH]                    | NA                                 | No                        | Pathogenic    |
| <i>MYO7A</i>  | c.-48A>G (IVS1-2A>G)      | p.?                      | 0                                | NA                                 | No                        | Pathogenic    |
| <i>MYO7A</i>  | c.5824G>T                 | p.Gly1942X               | 0                                | NA                                 | No                        | Pathogenic    |
| <i>MYO7A</i>  | c.6377delC                | p.Pro2126Leuf sX5        | 0 [0/96 CEPH]                    | NA                                 | No                        | Pathogenic    |
| <i>MYO7A</i>  | c.6577C>T                 | p.Leu2193Phe             | 0                                | 23 / 23 (100.00%)                  | No                        | UV4           |
| <i>MYO7A</i>  | c.722G>C                  | p.Arg241Pro              | 0                                | 23 / 23 (100.00%)                  | No                        | UV4           |
| <i>PCDH15</i> | c.2823delG                | p.Gly942ValfsX22         | 0 [0/96 CEPH]                    | NA                                 | No                        | Pathogenic    |
| <i>PCDH15</i> | c.3501+2T>C               | p.?                      | 0                                | NA                                 | No                        | Pathogenic    |
| <i>PCDH15</i> | Large deletion: Exon 9-18 | p.?                      | NA                               | NA                                 | No                        | Pathogenic    |
| <i>PCDH15</i> | Large deletion: Exon 10   | p.?                      | NA                               | NA                                 | No                        | Pathogenic    |
| <i>USH1C</i>  | c.1016G>A                 | p.Arg339Gln <sup>b</sup> | 0                                | 17 / 21 (80.95%)                   | No                        | UV2           |
| <i>USH1C</i>  | c.2227-1G>T <sup>c</sup>  | p.?                      | 0                                | NA                                 | No                        | Pathogenic    |

|              |                        |                       |                  |                                  |    |            |
|--------------|------------------------|-----------------------|------------------|----------------------------------|----|------------|
| <i>USH1C</i> | c.446_448delA<br>GG    | p.Glu149del           | NA               | NA                               | No | Pathogenic |
| <i>USH2A</i> | c.1019A>T              | p.His340Leu           | 0                | 17 / 17<br>(100.00%)             | No | UV3        |
| <i>USH2A</i> | c.6049G>T*             | p.Gly2017Cys          | 0                | 15/17 (88.24%)                   | No | UV2        |
| <i>USH2A</i> | c.10724G>A             | p.Cys3575Tyr          | 0                | 17 / 17<br>(100.00%)             | No | UV4        |
| <i>USH2A</i> | c.11047+1G>A           | p.?                   | 0 [0/96<br>CEPH] | NA                               | No | Pathogenic |
| <i>USH2A</i> | c.11065C>T             | p.Arg3689X            | 0 [0/96<br>CEPH] | NA                               | No | Pathogenic |
| <i>USH2A</i> | c.11390-1G>C           | p.?                   | 0 [0/96<br>CEPH] | NA                               | No | Pathogenic |
| <i>USH2A</i> | c.11872_11873<br>delAC | p.Gln3959Asn<br>fsX53 | 0                | NA                               | No | Pathogenic |
| <i>USH2A</i> | c.12295-3T>A           | p.?                   | 0 [0/96<br>CEPH] | NA                               | No | UV2        |
| <i>USH2A</i> | c.12457G>A             | p.Ala4153Thr          | 0.12             | 13 / 17<br>(76.47%) <sup>e</sup> | No | UV4        |
| <i>USH2A</i> | c.13130C>A             | p.Ser4377X            | 0                | NA                               | No | Pathogenic |
| <i>USH2A</i> | c.13621C>T             | p.Gln4541X            | 0                | NA                               | No | Pathogenic |
| <i>USH2A</i> | c.14139G>A             | p.Trp4713X            | 0                | NA                               | No | Pathogenic |
| <i>USH2A</i> | c.14285A>G             | p.Asn4762Ser          | 0                | 17 / 17<br>(100.00%)             | No | UV3        |
| <i>USH2A</i> | c.14403C>G             | p.Tyr4801X            | 0                | NA                               | No | Pathogenic |
| <i>USH2A</i> | c.14446A>T             | p.Lys4816X            | 0                | NA                               | No | Pathogenic |
| <i>USH2A</i> | c.14911C>T             | p.Arg4971X            | 0 [0/96<br>CEPH] | NA                               | No | Pathogenic |
| <i>USH2A</i> | c.1859G>T              | p.Cys620Phe           | 0                | 17 / 17<br>(100.00%)             | No | Pathogenic |
| <i>USH2A</i> | c.2236C>G              | p.Pro746Ala           | 0                | 17 / 17<br>(100.00%)             | No | UV4        |
| <i>USH2A</i> | c.2610C>A              | p.Cys870X             | 0 [0/96<br>CEPH] | NA                               | No | Pathogenic |
| <i>USH2A</i> | c.2942_2943ins<br>T    | p.Cys982Leufs<br>X2   | 0                | NA                               | No | Pathogenic |
| <i>USH2A</i> | c.2994_3007del         | p.Cys999Leufs<br>X9   | 0 [0/96<br>CEPH] | NA                               | No | Pathogenic |
| <i>USH2A</i> | c.3407G>A              | p.Ser1136Asn          | 0                | 17 / 17<br>(100.00%)             | No | UV4        |
| <i>USH2A</i> | c.3518C>A              | p.Ser1173X            | 0                | NA                               | No | Pathogenic |
| <i>USH2A</i> | c.4133T>C              | p.Leu1378Pro          | 0                | 15 / 17<br>(88.24%)              | No | UV4        |
| <i>USH2A</i> | c.4354dup              | p.Cys1452Leu<br>fsX25 | 0 [0/96<br>CEPH] | NA                               | No | Pathogenic |
| <i>USH2A</i> | c.4732C>T              | p.Arg1578Cys          | 0                | 15 / 17<br>(88.24%)              | No | UV4        |
| <i>USH2A</i> | c.4761delG             | p.Ser1588Hisf<br>sX5  | 0 [0/96<br>CEPH] | NA                               | No | Pathogenic |
| <i>USH2A</i> | c.4821G>A              | p.Trp1607X            | 0.12             | NA                               | No | Pathogenic |

|              |                               |                       |                   |                      |                 |            |
|--------------|-------------------------------|-----------------------|-------------------|----------------------|-----------------|------------|
| <i>USH2A</i> | c.5252 G>T                    | p.Gly1751Val          | 0                 | 14 / 17<br>(82.35%)  | No              | UV2        |
| <i>USH2A</i> | c.5329 C>T                    | p.Arg1777Trp          | 0                 | 6 / 17 (35.29%)      | No              | UV3        |
| <i>USH2A</i> | c.5603T>G                     | p.Phe1868Cys          | 0 [0/96<br>CEPH]  | 11 / 17<br>(64.71%)  | No              | UV2        |
| <i>USH2A</i> | c.5614_5620del<br>GCTGTCTG    | p.Ala1872Leuf<br>sX58 | 0 [0/96<br>CEPH]  | NA                   | No              | Pathogenic |
| <i>USH2A</i> | c.5834_5835ins<br>TC          | p.Arg1946Leu<br>fsX22 | 0                 | NA                   | No              | Pathogenic |
| <i>USH2A</i> | c.5898_5899del<br>AA          | p.Asn1967Trp<br>fsX5  | 0 [0/96<br>CEPH]  | NA                   | No              | Pathogenic |
| <i>USH2A</i> | c.651+1G>A                    | p.?                   | 0 [0/96<br>CEPH]  | NA                   | No              | Pathogenic |
| <i>USH2A</i> | c.6854A>G                     | p.Asn2285Ser          | 0 [0/96<br>CEPH]  | 16 / 17<br>(94.12%)  | No              | UV2        |
| <i>USH2A</i> | c.6928A>C                     | p.Thr2310Pro          | 0 [0/96<br>CEPH]  | 17 / 17<br>(100.00%) | Yes<br>(1/1258) | UV2        |
| <i>USH2A</i> | c.769G>A                      | p.Gly257Arg           | 0 [0/96<br>CEPH]  | 16 / 17<br>(94.12%)  | No              | UV2        |
| <i>USH2A</i> | c.8231G>A                     | p.Trp2744X            | 0 [0/96<br>CEPH]  | NA                   | No              | Pathogenic |
| <i>USH2A</i> | c.8261delT                    | p.Ile2754Asnf<br>sX15 | 0 [0/96<br>CEPH]  | NA                   | No              | Pathogenic |
| <i>USH2A</i> | c.842C>A                      | p.Thr281Lys           | 0 [0/93<br>CEPH]  | 15 / 17<br>(88.24%)  | No              | UV2        |
| <i>USH2A</i> | c.9371+1G>C                   | p.?                   | 0.12              | NA                   | No              | Pathogenic |
| <i>USH2A</i> | c.9459C>A                     | p.Cys3153X            | NA                | NA                   | No              | Pathogenic |
| <i>USH2A</i> | c.9842G>T                     | p.Cys3281Phe          | 0 [0/96<br>CEPHs] | 17 / 17<br>(100.00%) | No              | UV2        |
| <i>USH2A</i> | c.9912dup                     | p.Glu3305Arg<br>fsX41 | 0                 | NA                   | No              | Pathogenic |
| <i>USH2A</i> | Large deletion:<br>Exon 47    | p.?                   | 0 [0/96<br>CEPH]  | NA                   | No              | Pathogenic |
| <i>USH2A</i> | Large deletion:<br>Exon 50-55 | p.?                   | 0 [0/96<br>CEPH]  | NA                   | No              | Pathogenic |
| <i>GPR98</i> | c.10016G>A                    | p.Ser3339Asn          | 0                 | 17 / 19<br>(89.47%)  | No              | UV3        |
| <i>GPR98</i> | c.10736_37delC<br>C           | p.Ala3579Valf<br>sX6  | 0 [0/96<br>CEPH]  | NA                   | No              | Pathogenic |
| <i>GPR98</i> | c.13433G>T*                   | p.Ser4478Ile          | 0                 | 19 / 20<br>(95.00%)  | No              | UV3        |
| <i>GPR98</i> | c.14404C>T                    | p.Arg4802X            | 0                 | NA                   | No              | Pathogenic |
| <i>GPR98</i> | c.15144delC                   | p.Ser5048Argf<br>sX29 | 0 [0/96<br>CEPH]  | NA                   | No              | Pathogenic |
| <i>GPR98</i> | c.2398C>T                     | p.Arg800X             | 0.11              | NA                   | No              | Pathogenic |
| <i>GPR98</i> | c.4123G>C                     | p.Asp1375His          | 0                 | 14 / 20<br>(70.00%)  | No              | UV2        |
| <i>GPR98</i> | c.6307G>T                     | p.Glu2103X            | 0                 | NA                   | No              | Pathogenic |
| <i>GPR98</i> | c.6856C>T                     | p.Arg2286X            | NA                | NA                   | No              | Pathogenic |

|              |                            |                  |                   |                     |    |            |
|--------------|----------------------------|------------------|-------------------|---------------------|----|------------|
| <i>GPR98</i> | c.6962_63delT<br>G         | p.Val2321AlafsX4 | NA                | NA                  | No | Pathogenic |
| <i>GPR98</i> | c.9623+1G>A                | p.?              | 0                 | NA                  | No | Pathogenic |
| <i>GPR98</i> | c.9974T>C                  | p.Ile3325Thr     | 0 [0/96<br>CEPHs] | 17 / 19<br>(89.47%) | No | UV2        |
| <i>GPR98</i> | Large deletion:<br>Exon 83 | p.?              | 0 [0/96<br>CEPHs] | NA                  | No | Pathogenic |

### Legend to Supplementary Table 2.

\*Last nucleotide of an exon. Variant is predicted to significantly lower efficiency of adjacent splice site as predicted by *in silico* analysis (Human Splicing Finder, <http://www.umd.be/HSF/> and Splice Site Prediction by Neural Network, [www.fruitfly.org/seq\\_tools/splice.html](http://www.fruitfly.org/seq_tools/splice.html)).

NA-Not Applicable

<sup>a</sup> Minimum Allele Frequency in 876 control chromosomes unless stated otherwise

<sup>b</sup> Identified in NCUS proband with RP atypical for Usher syndrome

<sup>c</sup> Identified in NCUS proband who was diagnosed with sector RP and hearing loss.[22]

<sup>d</sup> Alignments were made using Usher Syndrome Missense Analysis tool (USMA). Full alignments are available via a link from LSDB for Usher syndrome. Unless stated otherwise, the mutated residue was not found in ortholog species

<sup>e</sup> Mutated residue was found in *Ciona intestinalis* and *Ciona savignyi* (family of sea squirts)

<sup>f</sup> Accessed on July 13th 2011 (<http://browser.1000genomes.org/index.htm>)

**Supplementary Table 3. Novel UV1 and Neutral variants.**

| Gene name    | DNA change                      | Protein change                   | MAF (%) in controls <sup>a</sup> | Pathogenicity |
|--------------|---------------------------------|----------------------------------|----------------------------------|---------------|
| <i>CDH23</i> | c.10036G>C                      | p.Glu3346Gln                     | 0.11                             | UV1           |
| <i>CDH23</i> | c.129C>T <sup>+</sup>           | p.Ser43Ser                       | NA                               | UV1           |
| <i>CDH23</i> | c.1307G>A                       | p.Ser436Asn                      | 0.34                             | Neutral       |
| <i>CDH23</i> | c.1369C>T                       | p.Arg457Trp                      | 0.23                             | UV1           |
| <i>CDH23</i> | c.1595C>T                       | p.Thr532Met                      | 0                                | UV1           |
| <i>CDH23</i> | c.173A>G                        | p.Gln58Arg                       | NA                               | UV1           |
| <i>CDH23</i> | c.1752+6G>A                     | p.?                              | NA                               | UV1           |
| <i>CDH23</i> | c.1919C>T                       | p.Thr640Met                      | 0                                | UV1           |
| <i>CDH23</i> | c.198G>A                        | p.Val66Val                       | NA                               | UV1           |
| <i>CDH23</i> | c.204C>T                        | p.Gly68Gly                       | NA                               | UV1           |
| <i>CDH23</i> | c.2235C>T <sup>+</sup>          | p.Ile745Ile                      | 0                                | UV1           |
| <i>CDH23</i> | c.2289+20G>C                    | p.?                              | NA                               | UV1           |
| <i>CDH23</i> | c.2970C>T                       | p.Asp990Asp                      | 0.69                             | Neutral       |
| <i>CDH23</i> | c.3337G>C                       | p.Glu1113Gln                     | 0                                | UV1           |
| <i>CDH23</i> | c.3664G>A                       | p.Ala1222Thr                     | NA                               | UV1           |
| <i>CDH23</i> | c.3801C>T                       | p.Thr1267Thr                     | 0.11                             | UV1           |
| <i>CDH23</i> | c.3845A>G                       | p.Asn1282Ser                     | 0.93                             | Neutral       |
| <i>CDH23</i> | c.3895G>A                       | p.Val1299Ile                     | 0                                | UV1           |
| <i>CDH23</i> | c.4231G>A                       | p.Glu1411Lys                     | 0                                | UV1           |
| <i>CDH23</i> | c.4287C>T                       | p.Pro1429Pro                     | 0                                | UV1           |
| <i>CDH23</i> | c.442G>A<br>[ENST00000224721]   | p.Gly148Arg<br>[ENST00000224721] | NA                               | UV1           |
| <i>CDH23</i> | c.444+3T>C<br>[ENST00000224721] | p.?                              | NA                               | UV1           |
| <i>CDH23</i> | c.4786C>T                       | p.Arg1596Cys                     | 0                                | UV1           |
| <i>CDH23</i> | c.4846-19G>A                    | p.?                              | NA                               | UV1           |
| <i>CDH23</i> | c.4890C>T <sup>+</sup>          | p.Asn1630Asn                     | 0                                | UV1           |
| <i>CDH23</i> | c.4947G>A                       | p.Thr1649Thr                     | 0                                | UV1           |
| <i>CDH23</i> | c.5067+15G>A                    | p.?                              | NA                               | UV1           |
| <i>CDH23</i> | c.551G>A                        | p.Arg184His                      | 0                                | UV1           |
| <i>CDH23</i> | c.5541C>T                       | p.Asn1847Asn                     | 0.12                             | UV1           |
| <i>CDH23</i> | c.5660C>T                       | p.Thr1887Ile                     | 0.34                             | Neutral       |
| <i>CDH23</i> | c.6197G>A                       | p.Arg2066Gln                     | 0.36                             | Neutral       |
| <i>CDH23</i> | c.6648C>T <sup>+</sup>          | p.Ala2216Ala                     | 0                                | UV1           |
| <i>CDH23</i> | c.67+19G>A                      | p.?                              | NA                               | UV1           |
| <i>CDH23</i> | c.7722C>T                       | p.Tyr2574Tyr                     | 0.34                             | Neutral       |

|              |              |              |                  |         |
|--------------|--------------|--------------|------------------|---------|
| <i>CDH23</i> | c.8722G>A*   | p.Gly2908Arg | 0                | UV1     |
| <i>CDH23</i> | c.9014C>T    | Ala3005Val   | 0                | UV1     |
| <i>CDH23</i> | c.9015G>A    | Ala3005Ala   | 0.11             | UV1     |
| <i>CDH23</i> | c.9238G>A    | Ala3080Thr   | 0.23             | UV1     |
| <i>CDH23</i> | c.9319+11G>A | p.?          | NA               | UV1     |
| <i>CDH23</i> | c.9973C>G    | Arg3325Gly   | 0                | UV1     |
| <i>MYO7A</i> | c.1081-10G>C | p.?          | NA               | UV1     |
| <i>MYO7A</i> | c.1407G>A    | Val469Val    | NA               | UV1     |
| <i>MYO7A</i> | c.133-7C>T   | p.?          | NA               | UV1     |
| <i>MYO7A</i> | c.1543A>C    | Lys515Gln    | 0.12             | UV1     |
| <i>MYO7A</i> | c.1554+8G>A  | p.?          | NA               | UV1     |
| <i>MYO7A</i> | c.1817G>A    | p.Arg606His  | 0                | UV1     |
| <i>MYO7A</i> | c.1969C>T    | p.Arg657Trp  | 0                | UV1     |
| <i>MYO7A</i> | c.2057G>A    | p.Arg686His  | 0.11             | UV1     |
| <i>MYO7A</i> | c.2120G>A    | p.Arg707His  | 0                | UV1     |
| <i>MYO7A</i> | c.2617C>T    | p.Arg873Trp  | 0.11             | UV1     |
| <i>MYO7A</i> | c.2886G>C    | p.Gln962His  | 0                | UV1     |
| <i>MYO7A</i> | c.3453G>A    | p.Leu1151Leu | NA               | UV1     |
| <i>MYO7A</i> | c.359 G>A    | p.Arg120His  | 0                | UV1     |
| <i>MYO7A</i> | c.4023C>T    | p.Pro1341Pro | 0                | UV1     |
| <i>MYO7A</i> | c.4074C>T    | p.Ser1358Ser | 0.47             | Neutral |
| <i>MYO7A</i> | c.4161C>A    | p.Asp1387Glu | 0                | UV1     |
| <i>MYO7A</i> | c.4461C>T    | p.Asn1487Asn | 0.23             | UV1     |
| <i>MYO7A</i> | c.4505 A>G   | p.Asp1502Gly | 0                | UV1     |
| <i>MYO7A</i> | c.4619 C>T   | p.Ala1540Val | 0                | UV1     |
| <i>MYO7A</i> | c.4845C>A    | p.Pro1615Pro | NA               | UV1     |
| <i>MYO7A</i> | c.4950C>T    | p.Asn1650Asn | 0                | UV1     |
| <i>MYO7A</i> | c.495G>A     | p.Thr165Thr  | 0.12             | UV1     |
| <i>MYO7A</i> | c.5122C>A    | p.Arg1708Ser | 0                | UV1     |
| <i>MYO7A</i> | c.5216G>A    | p.Arg1739Gln | NA               | UV1     |
| <i>MYO7A</i> | c.5245C>T    | p.Arg1749Trp | 0.12             | UV1     |
| <i>MYO7A</i> | c.54G>C      | p.Gln18His   | 0.12             | UV1     |
| <i>MYO7A</i> | c.5619G>A    | p.Arg1873Arg | NA               | UV1     |
| <i>MYO7A</i> | c.569T>G     | p.Leu190Trp  | 0 [0/96<br>CEPH] | UV1     |
| <i>MYO7A</i> | c.5866G>A    | p.Val1956Ile | 0.24             | UV1     |
| <i>MYO7A</i> | c.6051+16C>G | p.?          | NA               | UV1     |
| <i>MYO7A</i> | c.6509C>T    | p.Thr2170Ile | NA               | UV1     |
| <i>MYO7A</i> | c.6626G>A    | p.Arg2209Gln | 0                | UV1     |
| <i>MYO7A</i> | c.6640G>A    | p.Gly2214Ser | 0.11             | UV1     |
| <i>MYO7A</i> | c.973A>T     | p.Ile325Phe  | 0                | UV1     |



|               |                          |                                |      |         |
|---------------|--------------------------|--------------------------------|------|---------|
| <i>MYO7A</i>  | c.974T>G                 | p.Ile325Ser                    | 0    | UV1     |
| <i>MYO7A</i>  | c.5598C>A                | p.Leu1866Leu                   | 0.23 | UV1     |
| <i>PCDH15</i> | c.2625G>C                | p.Ser875Ser                    | NA   | UV1     |
| <i>PCDH15</i> | c.319-20A>T              | p.?                            | NA   | UV1     |
| <i>PCDH15</i> | c.3502-8C>T              | p.?                            | NA   | UV1     |
| <i>PCDH15</i> | c.3795A>G                | p.Glu1265Asp                   | 0    | UV1     |
| <i>PCDH15</i> | c.3983+12T>C             | p.?                            | NA   | UV1     |
| <i>PCDH15</i> | c.4974A>C                | p.Ser1658Ser                   | 0.11 | UV1     |
| <i>PCDH15</i> | c.5247_5249de<br>ITCC    | p.Pro1752del                   | 0.57 | Neutral |
| <i>PCDH15</i> | c.5263C>T                | p.Pro1755Ser                   | NA   | UV1     |
| <i>PCDH15</i> | c.5358_5359in<br>sCCTCTT | p.Ile1786_Pro17<br>87insProLeu | NA   | UV1     |
| <i>PCDH15</i> | c.5359C>T                | p.Pro1787Ser                   | NA   | UV1     |
| <i>PCDH15</i> | c.5398G>A                | p.Val1800Ile                   | NA   | UV1     |
| <i>PCDH15</i> | c.5550C>A                | p.Thr1850Thr                   | NA   | UV1     |
| <i>PCDH15</i> | c.5707A>G                | p.Ile1903Val                   | NA   | UV1     |
| <i>USH1C</i>  | c.1086-13G>T             | p.?                            | NA   | UV1     |
| <i>USH1C</i>  | c.1430G>A                | p.Arg477Gln                    | 0    | UV1     |
| <i>USH1C</i>  | c.2340C>T                | p.Val780Val                    | NA   | UV1     |
| <i>USH1C</i>  | c.324T>C                 | p.Phe108Phe                    | 0    | UV1     |
| <i>USH1G</i>  | c.1152C>T                | p.Asp384Asp                    | 0    | UV1     |
| <i>USH1G</i>  | c.388A>G                 | p.Lys130Glu                    | 0    | UV1     |
| <i>USH1G</i>  | c.501C>G                 | p.Arg167Arg                    | 0.12 | UV1     |
| <i>USH1G</i>  | c.566G>A                 | p.Arg189Gln                    | 0.12 | UV1     |
| <i>USH1G</i>  | c.678C>A                 | p.Gly226Gly                    | 0    | UV1     |
| <i>USH1G</i>  | c.705G>A                 | p.Glu235Glu                    | 0.12 | UV1     |
| <i>USH1G</i>  | c.83C>T                  | p.Pro28Leu                     | NA   | UV1     |
| <i>GPR98</i>  | c.10260C>T <sup>+</sup>  | p.Phe3420Phe                   | 0    | UV1     |
| <i>GPR98</i>  | c.10796+9A><br>G         | p.?                            | NA   | UV1     |
| <i>GPR98</i>  | c.10873C>G               | p.Leu3625Val                   | NA   | UV1     |
| <i>GPR98</i>  | c.10927A>G               | p.Thr3643Ala                   | 0.11 | UV1     |
| <i>GPR98</i>  | c.11599G>A               | p.Glu3867Lys                   | NA   | UV1     |
| <i>GPR98</i>  | c.12121-<br>16A>G        | p.?                            | NA   | UV1     |
| <i>GPR98</i>  | c.13232-7A>G             | p.?                            | NA   | UV1     |
| <i>GPR98</i>  | c.13358A>G               | p.His4453Arg                   | 0    | UV1     |
| <i>GPR98</i>  | c.13919G>A               | p.Gly4640Glu                   | 0    | UV1     |
| <i>GPR98</i>  | c.14309G>A               | p.Arg4770His                   | 0.92 | Neutral |
| <i>GPR98</i>  | c.14856C>T               | p.His4952His                   | 0    | UV1     |
| <i>GPR98</i>  | c.15105C>T <sup>+</sup>  | p.Ser5035Ser                   | NA   | UV1     |
| <i>GPR98</i>  | c.15301G>A <sup>+</sup>  | p.Gly5101Arg                   | 0.36 | Neutral |
| <i>GPR98</i>  | c.15343C>T               | p.Leu5115Leu                   | 0    | UV1     |

|              |                        |              |                         |         |
|--------------|------------------------|--------------|-------------------------|---------|
| <i>GPR98</i> | c.16164A>G             | p.Arg5388Arg | 1.54                    | Neutral |
| <i>GPR98</i> | c.16312A>G             | p.Thr5438Ala | 0.48                    | Neutral |
| <i>GPR98</i> | c.18026G>A             | p.Arg6009Gln | 0                       | UV1     |
| <i>GPR98</i> | c.18040T>C             | p.Phe6014Leu | 0                       | UV1     |
| <i>GPR98</i> | c.18273A>G             | p.Ala6091Ala | 0.23                    | UV1     |
| <i>GPR98</i> | c.18311-8_12delTTTT    | p.?          | NA                      | UV1     |
| <i>GPR98</i> | c.1849G>A              | p.Val617Met  | NA                      | UV1     |
| <i>GPR98</i> | c.18746T>G             | p.Leu6249Arg | 0                       | UV1     |
| <i>GPR98</i> | c.18753C>T             | p.Ala6251Ala | 0                       | UV1     |
| <i>GPR98</i> | c.18782T>C             | p.Leu6261Ser | 0                       | UV1     |
| <i>GPR98</i> | c.18802+9G>A           | p.?          | NA                      | UV1     |
| <i>GPR98</i> | c.18803-13A>G          | p.?          | NA                      | UV1     |
| <i>GPR98</i> | c.2185A>G              | p.Ile729Val  | 0                       | UV1     |
| <i>GPR98</i> | c.2284C>T              | p.Arg762Cys  | 0                       | UV1     |
| <i>GPR98</i> | c.2516T>C              | p.Val839Ala  | 0.12                    | UV1     |
| <i>GPR98</i> | c.2553+11T>A           | p.?          | NA                      | UV1     |
| <i>GPR98</i> | c.2735-10C>A           | p.?          | NA                      | UV1     |
| <i>GPR98</i> | c.2834G>A              | p.Gly945Glu  | NA                      | UV1     |
| <i>GPR98</i> | c.3022+8T>C            | p.?          | NA                      | UV1     |
| <i>GPR98</i> | c.3255T>C              | p.Asp1085Asp | 0.12                    | UV1     |
| <i>GPR98</i> | c.327C>T               | p.Asp109Asp  | 0.24                    | UV1     |
| <i>GPR98</i> | c.3289G>A*             | p.Gly1097Ser | 0.11                    | UV1     |
| <i>GPR98</i> | c.3635-10C>A           | p.?          | NA                      | UV1     |
| <i>GPR98</i> | c.3805T>C              | p.Phe1269Leu | 0                       | UV1     |
| <i>GPR98</i> | c.380T>G               | p.Leu127Arg  | 2.22%<br>[2/90<br>CEPH] | UV1     |
| <i>GPR98</i> | c.3975G>A              | p.Thr1325Thr | 0                       | UV1     |
| <i>GPR98</i> | c.4214C>T <sup>+</sup> | p.Ser1405Ser | NA                      | UV1     |
| <i>GPR98</i> | c.4260A>G              | p.Glu1420Glu | 0.84                    | Neutral |
| <i>GPR98</i> | c.5104C>T              | p.Pro1702Ser | 0                       | UV1     |
| <i>GPR98</i> | c.5221T>C <sup>+</sup> | p.Leu1741Leu | 0                       | UV1     |
| <i>GPR98</i> | c.5525-7C>T            | p.?          |                         | UV1     |
| <i>GPR98</i> | c.5785G>T              | p.Ala1929Ser | 0.24                    | UV1     |
| <i>GPR98</i> | c.6012G>T              | p.Leu2004Phe | NA                      | UV1     |
| <i>GPR98</i> | c.6289C>T              | p.Arg2097Cys | 1.19                    | Neutral |
| <i>GPR98</i> | c.6317C>T              | p.Ala2106Val | 0.69                    | Neutral |
| <i>GPR98</i> | c.6318G>A              | p.Ala2106Ala | 0.68                    | Neutral |
| <i>GPR98</i> | c.6608 T>C             | p.Val2203Ala | 0.34                    | Neutral |
| <i>GPR98</i> | c.6695A>G              | p.Tyr2232Cys | NA                      | UV1     |

|              |                       |              |                     |         |
|--------------|-----------------------|--------------|---------------------|---------|
| <i>GPR98</i> | c.6938C>T             | p.Pro2313Leu | 0                   | UV1     |
| <i>GPR98</i> | c.6994A>T             | p.Ile2332Phe | 0                   | UV1     |
| <i>GPR98</i> | c.7176C>T             | p.Ser2392Ser | 0.24                | UV1     |
| <i>GPR98</i> | c.7179C>T             | p.Asp2393Asp | 1.48                | Neutral |
| <i>GPR98</i> | c.7229A>G             | p.Tyr2410Cys | 0.11                | UV1     |
| <i>GPR98</i> | c.7293C>T             | p.Ala2431Ala | 0                   | UV1     |
| <i>GPR98</i> | c.7576 A>G            | p.Ile2526Val | 0                   | UV1     |
| <i>GPR98</i> | c.7821G>A             | p.Glu2607Glu | 0.36                | Neutral |
| <i>GPR98</i> | c.7874G>A             | p.Arg2625His | NA                  | UV1     |
| <i>GPR98</i> | c.9280G>A             | p.Val3094Ile | NA                  | UV1     |
| <i>GPR98</i> | c.9650C>T             | p.Ala3217Val | 0.8                 | Neutral |
| <i>GPR98</i> | c.9743G>A             | p.Gly3248Asp | NA                  | UV1     |
| <i>USH2A</i> | c.10062G>C            | p.Val3354Val | 0.11                | UV1     |
| <i>USH2A</i> | c.10510 C>G           | p.Pro3504Ala | 0.12                | UV1     |
| <i>USH2A</i> | c.11597C>T            | p.Ala3866Val | 0                   | UV1     |
| <i>USH2A</i> | c.1174C>T             | p.Pro392Ser  | 0                   | UV1     |
| <i>USH2A</i> | c.11928G>A            | p.Thr3976Thr | NA                  | UV1     |
| <i>USH2A</i> | c.12505A>G            | p.Thr4169Ala | 0                   | UV1     |
| <i>USH2A</i> | c.12823T>A            | p.Ser4275Thr | 0.11                | UV1     |
| <i>USH2A</i> | c.12910G>A            | p.Glu4304Lys | 0                   | UV1     |
| <i>USH2A</i> | c.13631G>T            | p.Gly4544Val | 0                   | UV1     |
| <i>USH2A</i> | c.1453A>G             | p.Ile485Val  | 0                   | UV1     |
| <i>USH2A</i> | c.1731C>T             | p.Cys577Cys  | 0.24                | UV1     |
| <i>USH2A</i> | c.2844 C>G            | p.Cys948Trp  | 0                   | UV1     |
| <i>USH2A</i> | c.2844C>G             | p.Cys948Trp  | 0                   | UV1     |
| <i>USH2A</i> | c.3261 C>T            | p.Ile1207Ile | 0                   | UV1     |
| <i>USH2A</i> | c.3945T>C             | p.Asn1315Asn | 1.12                | Neutral |
| <i>USH2A</i> | c.4115C>A             | p.Pro1372His | 0.12                | UV1     |
| <i>USH2A</i> | c.4560C>T             | p.Ile1520Ile | 0.46                | Neutral |
| <i>USH2A</i> | c.5142 T>C            | p.Asn1714Asn | 0                   | UV1     |
| <i>USH2A</i> | c.550A>C              | p.Thr184Pro  | 0 [0/96<br>CEPH]    | UV1     |
| <i>USH2A</i> | c.7130A>G             | p.Asn2377Ser | 0.81                | Neutral |
| <i>USH2A</i> | c.7584C>T             | p.Thr2528Thr | 0.11                | UV1     |
| <i>USH2A</i> | c.785-17_-<br>14delAT | p.?          | 0                   | UV1     |
| <i>USH2A</i> | c.8681+18A><br>G      | p.?          | 4.35 [4/92<br>CEPH] | UV1     |
| <i>USH2A</i> | c.9228C>A             | p.Asp3076Glu | 0                   | UV1     |
| <i>USH3A</i> | c.126G>A              | p.Thr42Thr   | 0                   | UV1     |
| <i>USH3A</i> | c.6A>C                | p.Pro2Pro    | 0.46                | Neutral |
| <i>WHRN</i>  | c.1166+18<br>G>A      | p.?          | NA                  | UV1     |
| <i>WHRN</i>  | c.1365T>C             | p.Ser455Ser  | NA                  | UV1     |

|               |                         |              |                                         |         |
|---------------|-------------------------|--------------|-----------------------------------------|---------|
| <i>WHRN</i>   | c.1653 C>T <sup>†</sup> | p.Gly551Gly  | NA                                      | UV1     |
| <i>WHRN</i>   | c.2118A>G               | p.Pro706Pro  | NA                                      | UV1     |
| <i>WHRN</i>   | c.2485 G>A              | p.Ala829Thr  | NA                                      | UV1     |
| <i>WHRN</i>   | c.409 G>C               | p.Glu137Gln  | 0 [0/134<br>ECCAC]                      | UV1     |
| <i>WHRN</i>   | c.755A>G                | p.Gln252Arg  | 0 [0/98<br>ECCAC;<br>0/84<br>Pakistani] | UV1     |
| <i>SLC4A7</i> | c.1740-3T>C             | p.?          | NA                                      | UV1     |
| <i>SLC4A7</i> | c.2314C>T               | p.Pro772Ser  | 1.72                                    | Neutral |
| <i>SLC4A7</i> | c.3624G>A               | p.Val1208Val | 0                                       | UV1     |
| <i>SLC4A7</i> | c.402-7C>T              | p.?          | NA                                      | UV1     |
| <i>SLC4A7</i> | c.459T>C                | p.Tyr53Tyr   | NA                                      | UV1     |
| <i>SLC4A7</i> | c.756A>T                | p.Glu252Asp  | 0.12                                    | UV1     |

### Legend to Supplementary Table 3.

\*Last nucleotide of an exon. CDH23:c.8722G>A, (p.Gly2908Arg), and GPR98:c.3289G>A (p.Gly1097Ser) had no significant effect on predicted use of splice sites.

<sup>†</sup>Novel synonymous changes in which there was no other contributing evidence to their pathogenicity ie. the patient had a single or no other pathogenic/UV3/UV4 mutations accounting for their disease in the same or another gene *and* they do not appear or have not been assessed in controls, were also analysed *in silico* (Human Splicing Finder, <http://www.umd.be/HSF/> and Splice Site Prediction by Neural Network, [www.fruitfly.org/seq\\_tools/splice.html](http://www.fruitfly.org/seq_tools/splice.html)). There was no significant effect on splicing except for the variant *WHRN*:c.1653C>T, (p.Gly551Gly); this increased splice score by >20% for creation of a novel splice site (Human Splicing Finder, <http://www.umd.be/HSF/>) - initial score of 65 for wild-type C increasing to 92 for variant T. However this variant showed no effect on splicing using Splice Site Prediction by Neural Network, [www.fruitfly.org/seq\\_tools/splice.html](http://www.fruitfly.org/seq_tools/splice.html)).

<sup>a</sup> Minimum Allele Frequency in 878 control chromosomes unless stated otherwise; NA-not assessed
